# Supplementary material for: MicroRNA Target Identification: Revisiting Accessibility and Seed Anchoring
Source: MDPI journal article supplement (doi:10.3390/genes14030664), 2023-03-07
Supplement: s1 [file s1]

## Supplementary tables and figures

**Table S1.** Version and execution details for each tool.

| Methods        | Version                                                   | Execution                                                                                                                                                                           |
|----------------|-----------------------------------------------------------|-------------------------------------------------------------------------------------------------------------------------------------------------------------------------------------|
| MiRANDA        | MiRANDA v3.3a                                             | MiRANDA mir_file mrna_file                                                                                                                                                          |
| INTARNA        | INTARNA 2.3.1 using ViennaPackage 2.4.11 and boost 1.68.0 | INTARNA -q mir_file -t utr_file -out STDOUT -outMode C -n nb_predictions                                                                                                            |
| PITA           | Version 2008 64bit                                        | PITA -utr utr_file -mir mir_file -prefix output                                                                                                                                     |
| MEME           | MEME suite 5.4.1                                          | MEME sequence_file -dna -oc script_path -nostatus -time 14400 -mod oops -nmotifs nb_motifs -minw min_size_motif -maxw max_size_motif -objfun classic -revcomp -markov_order 0 -text |
| Vienna Package | 2.4.15                                                    |                                                                                                                                                                                     |

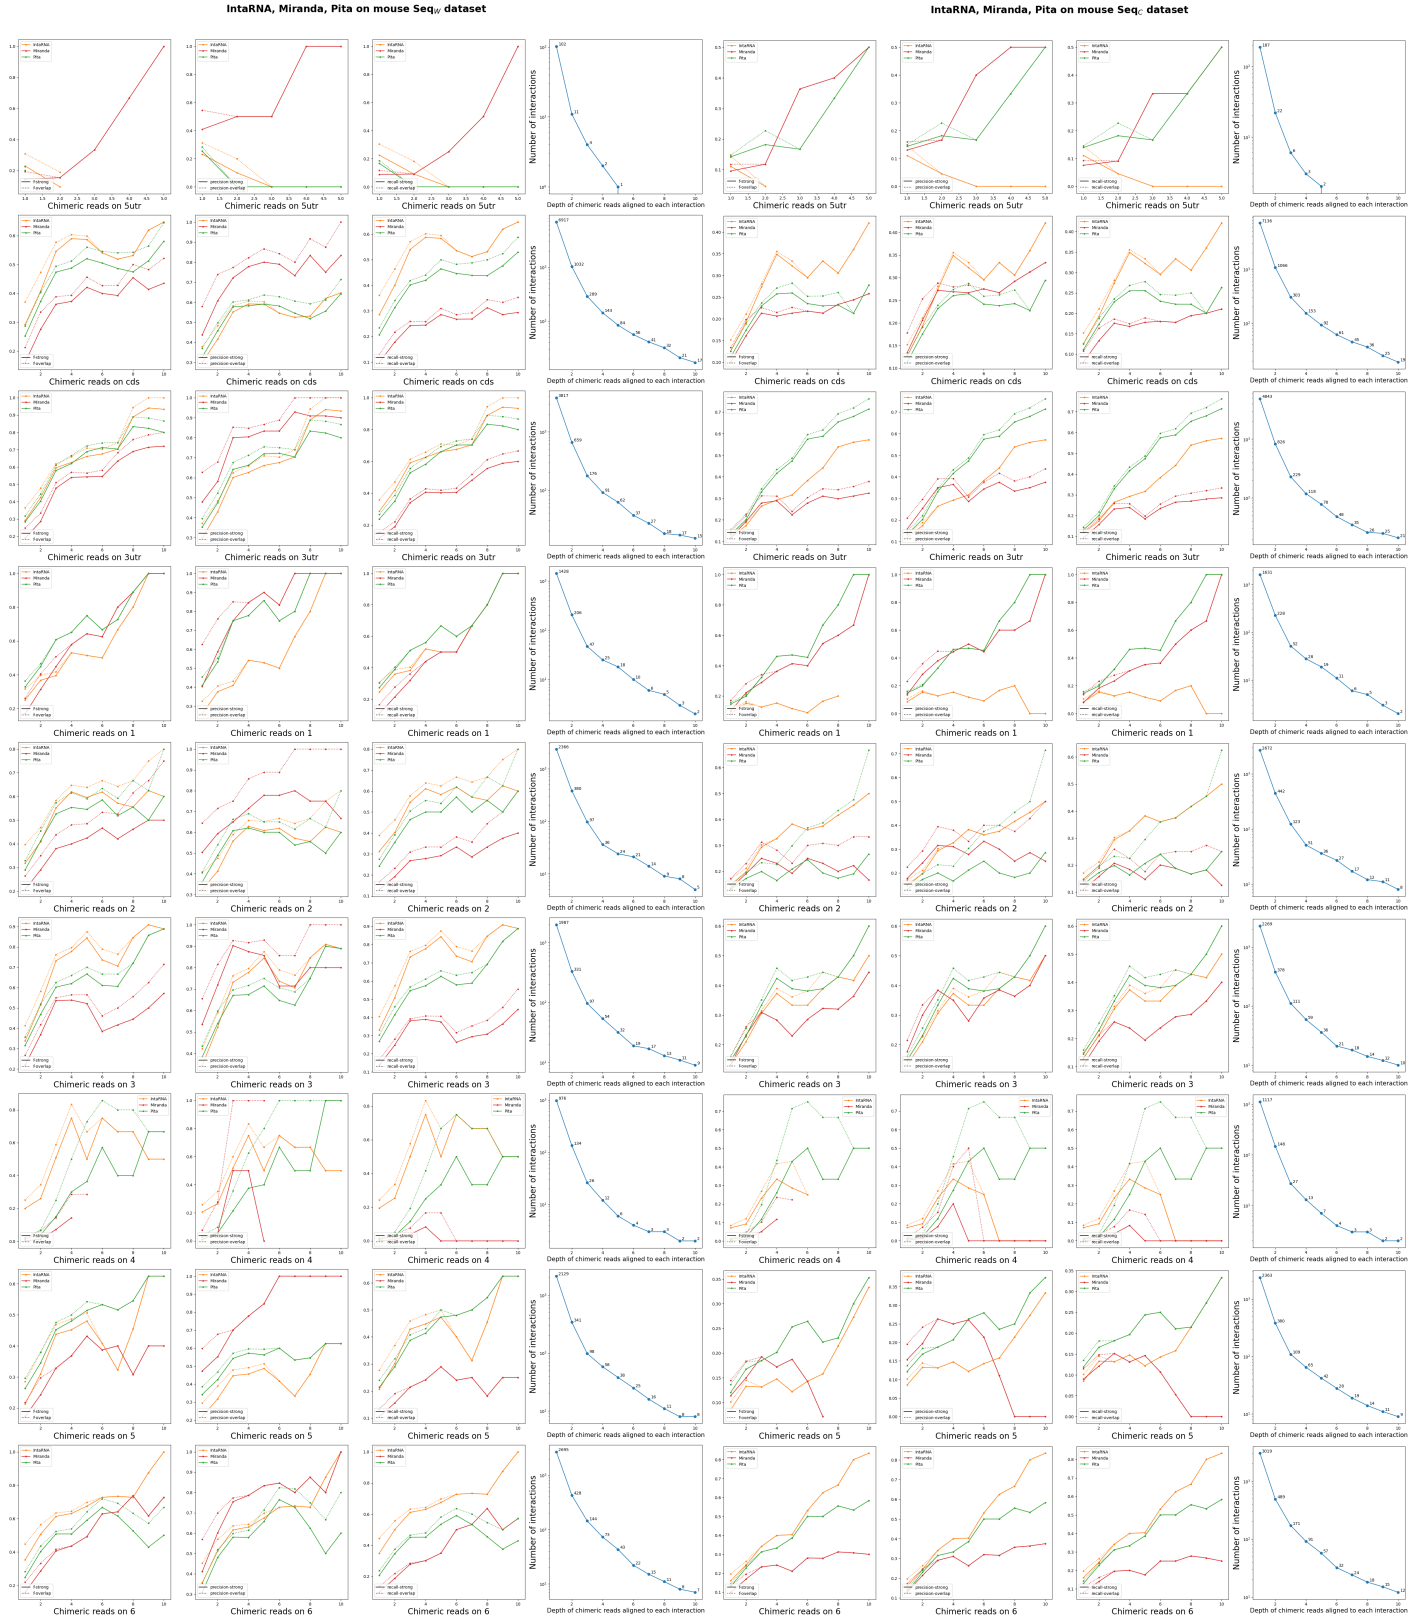

**Figure S1.** Performance of the three methods considering accessibility and seed match on the mouse Seq<sub>W</sub> and Seq<sub>C</sub> datasets.

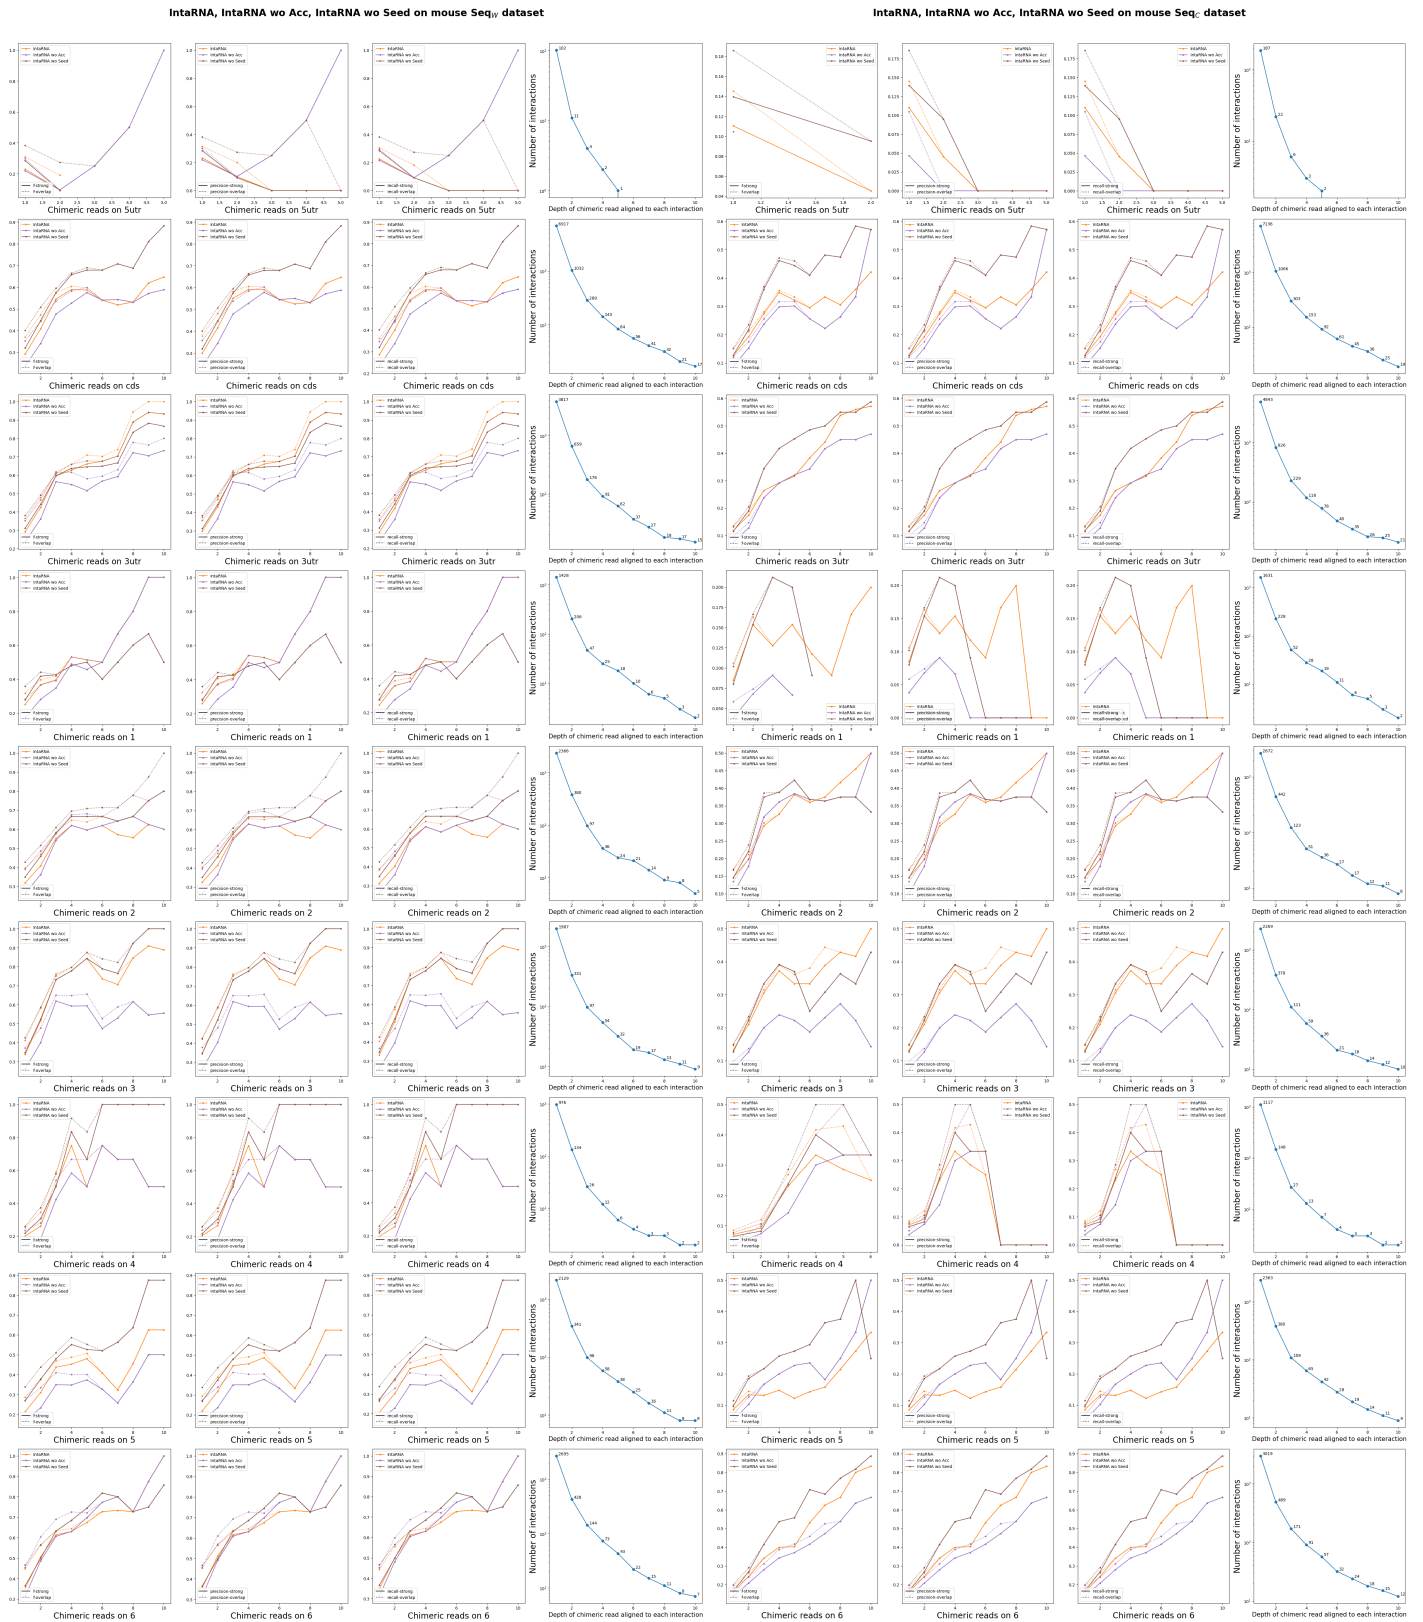

**Figure S2.** Performance of INTARNA considering or not accessibility and seed match on the mouse Seq<sub>W</sub> and Seq<sub>C</sub> datasets. The term wo in the Figure stands for WithOut.

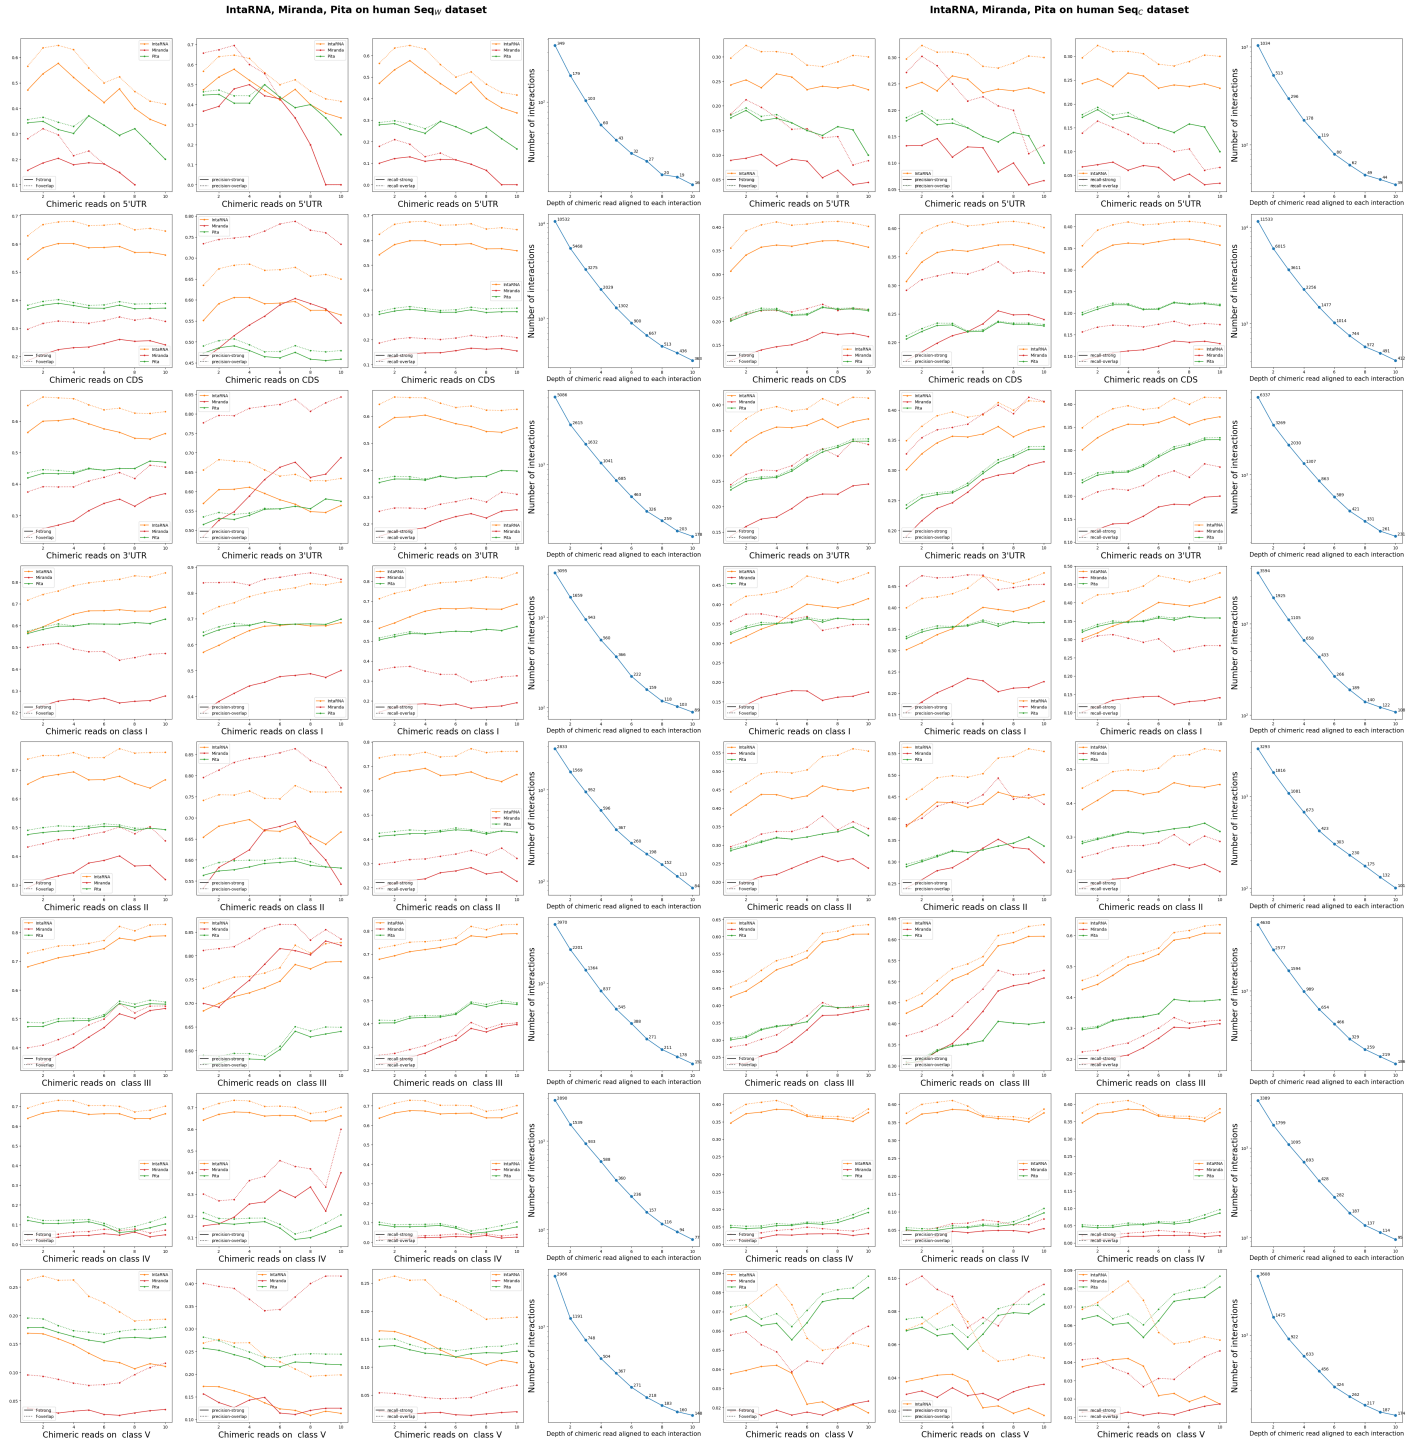

**Figure S3.** Performance of the three methods considering accessibility and seed match on the human Seq<sub>W</sub> and Seq<sub>C</sub> datasets.



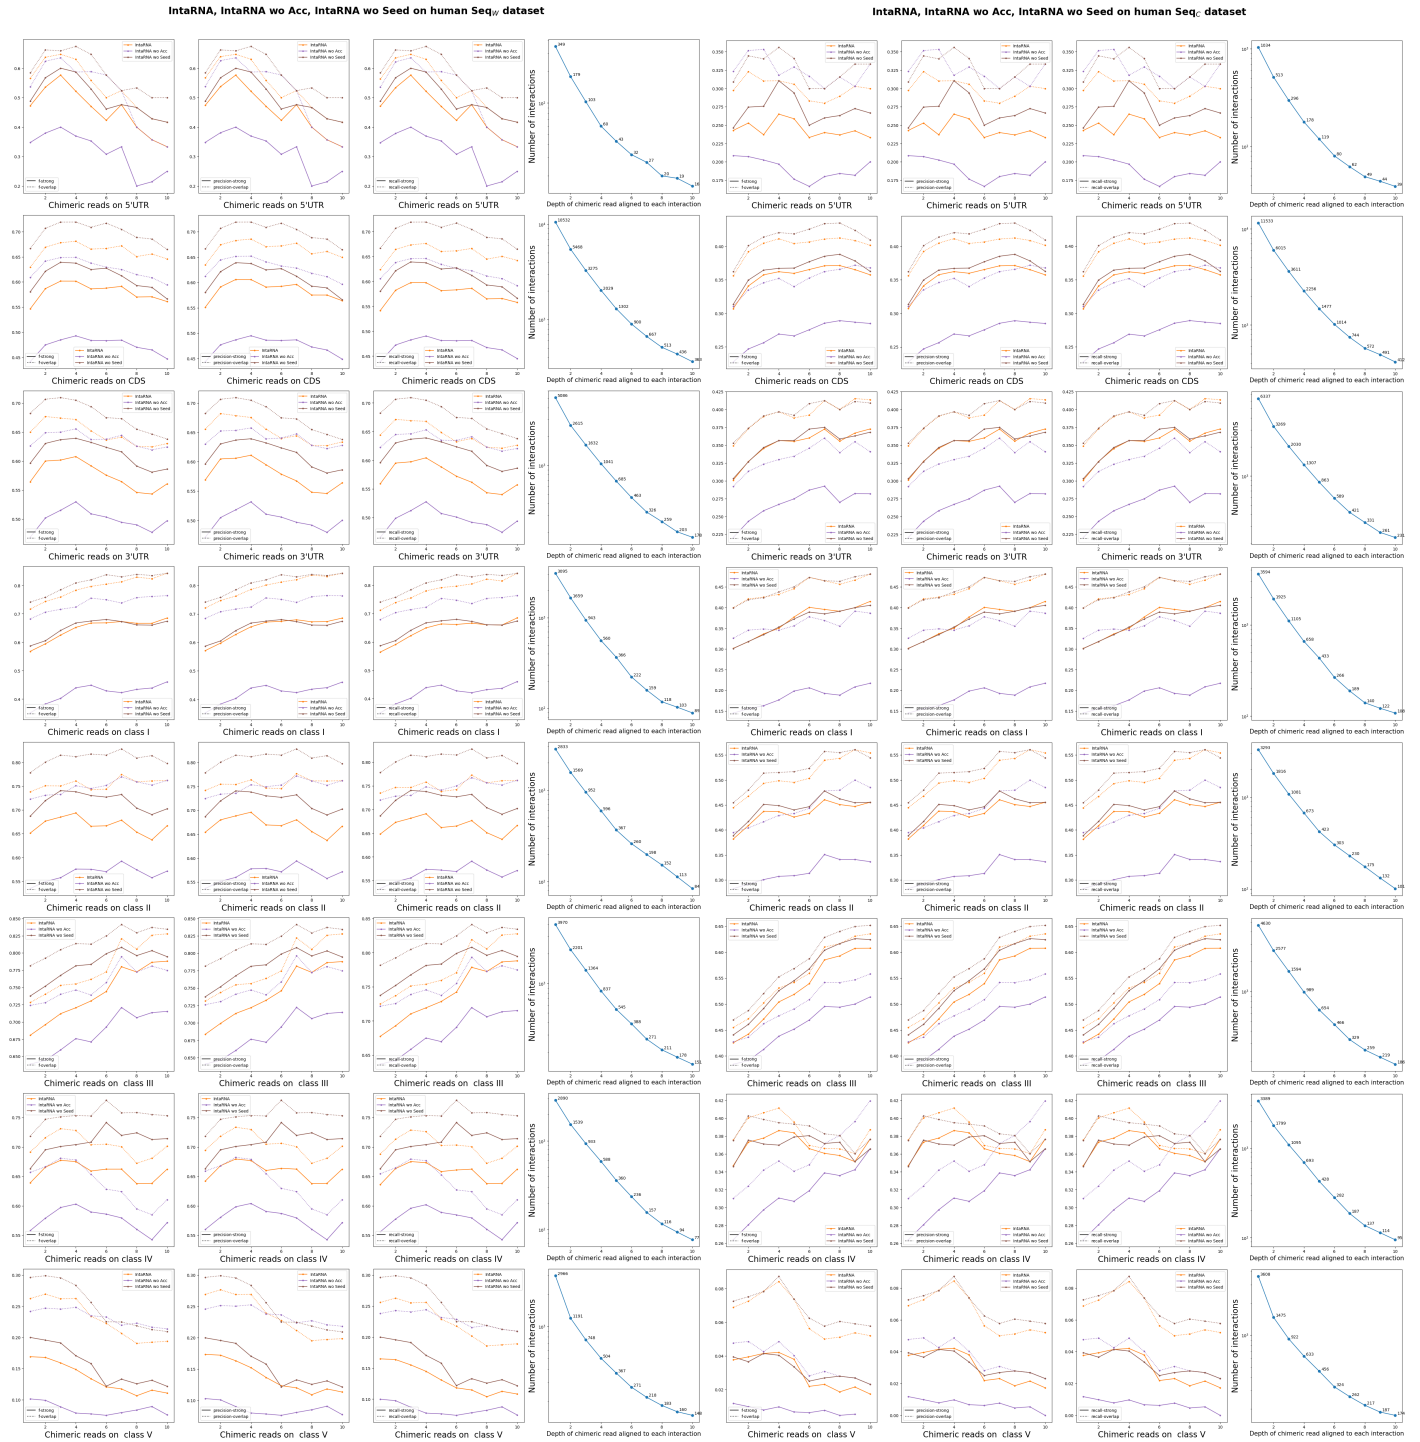

**Figure S4.** Performance of INTARNA considering or not accessibility and seed match on the human Seq<sub>W</sub> and Seq<sub>C</sub> datasets. The term wo in the Figure stands for WithOut.

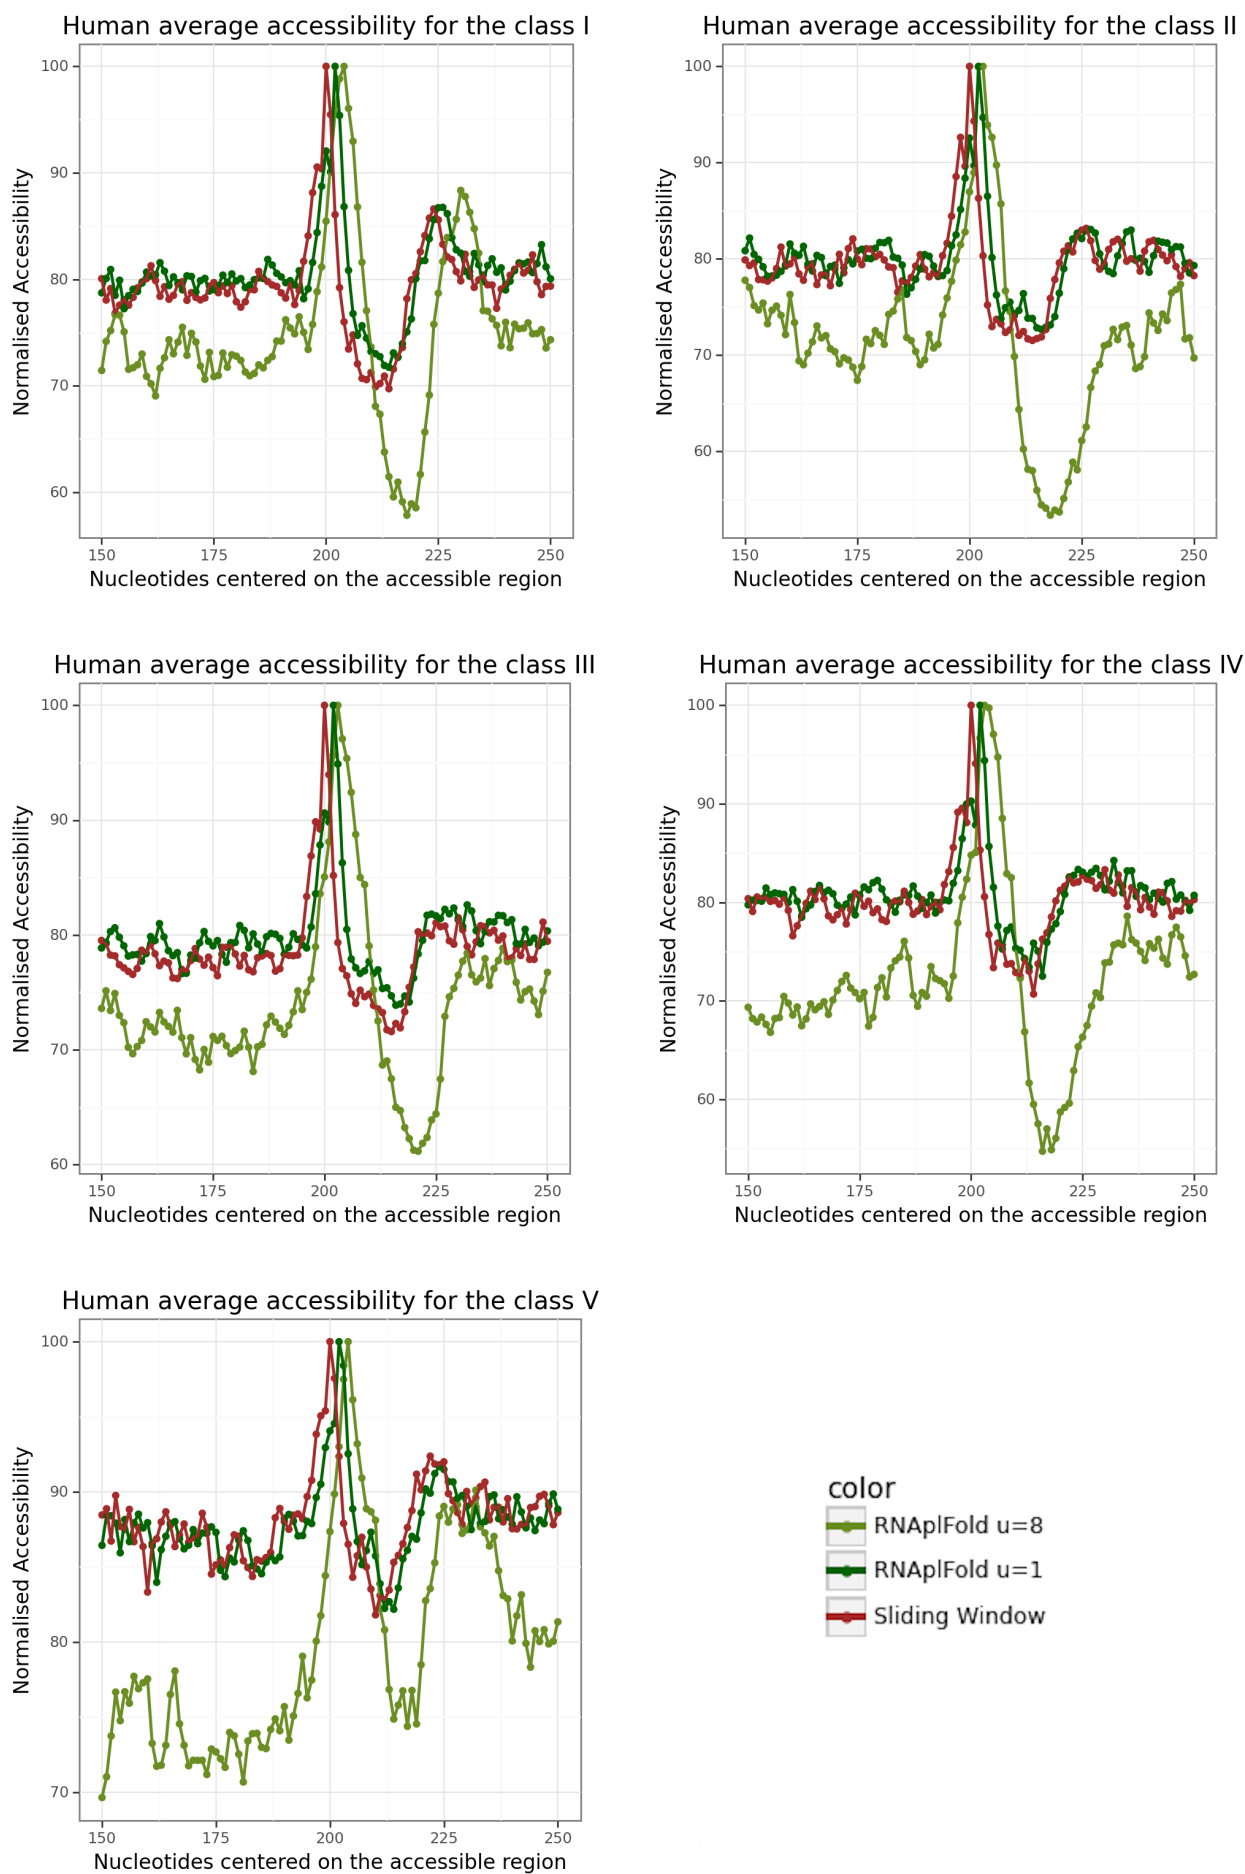

**Figure S5.** Normalised accessibility of all classes on Seq<sub>W</sub> of the human dataset. In red, the normalised accessibility when considering only the optimal structure with a sliding window. In darkgreen and in olivegreen, the normalised accessibility computed with RNAPFOLD with an accessible window  $u$  of 1 and 8.

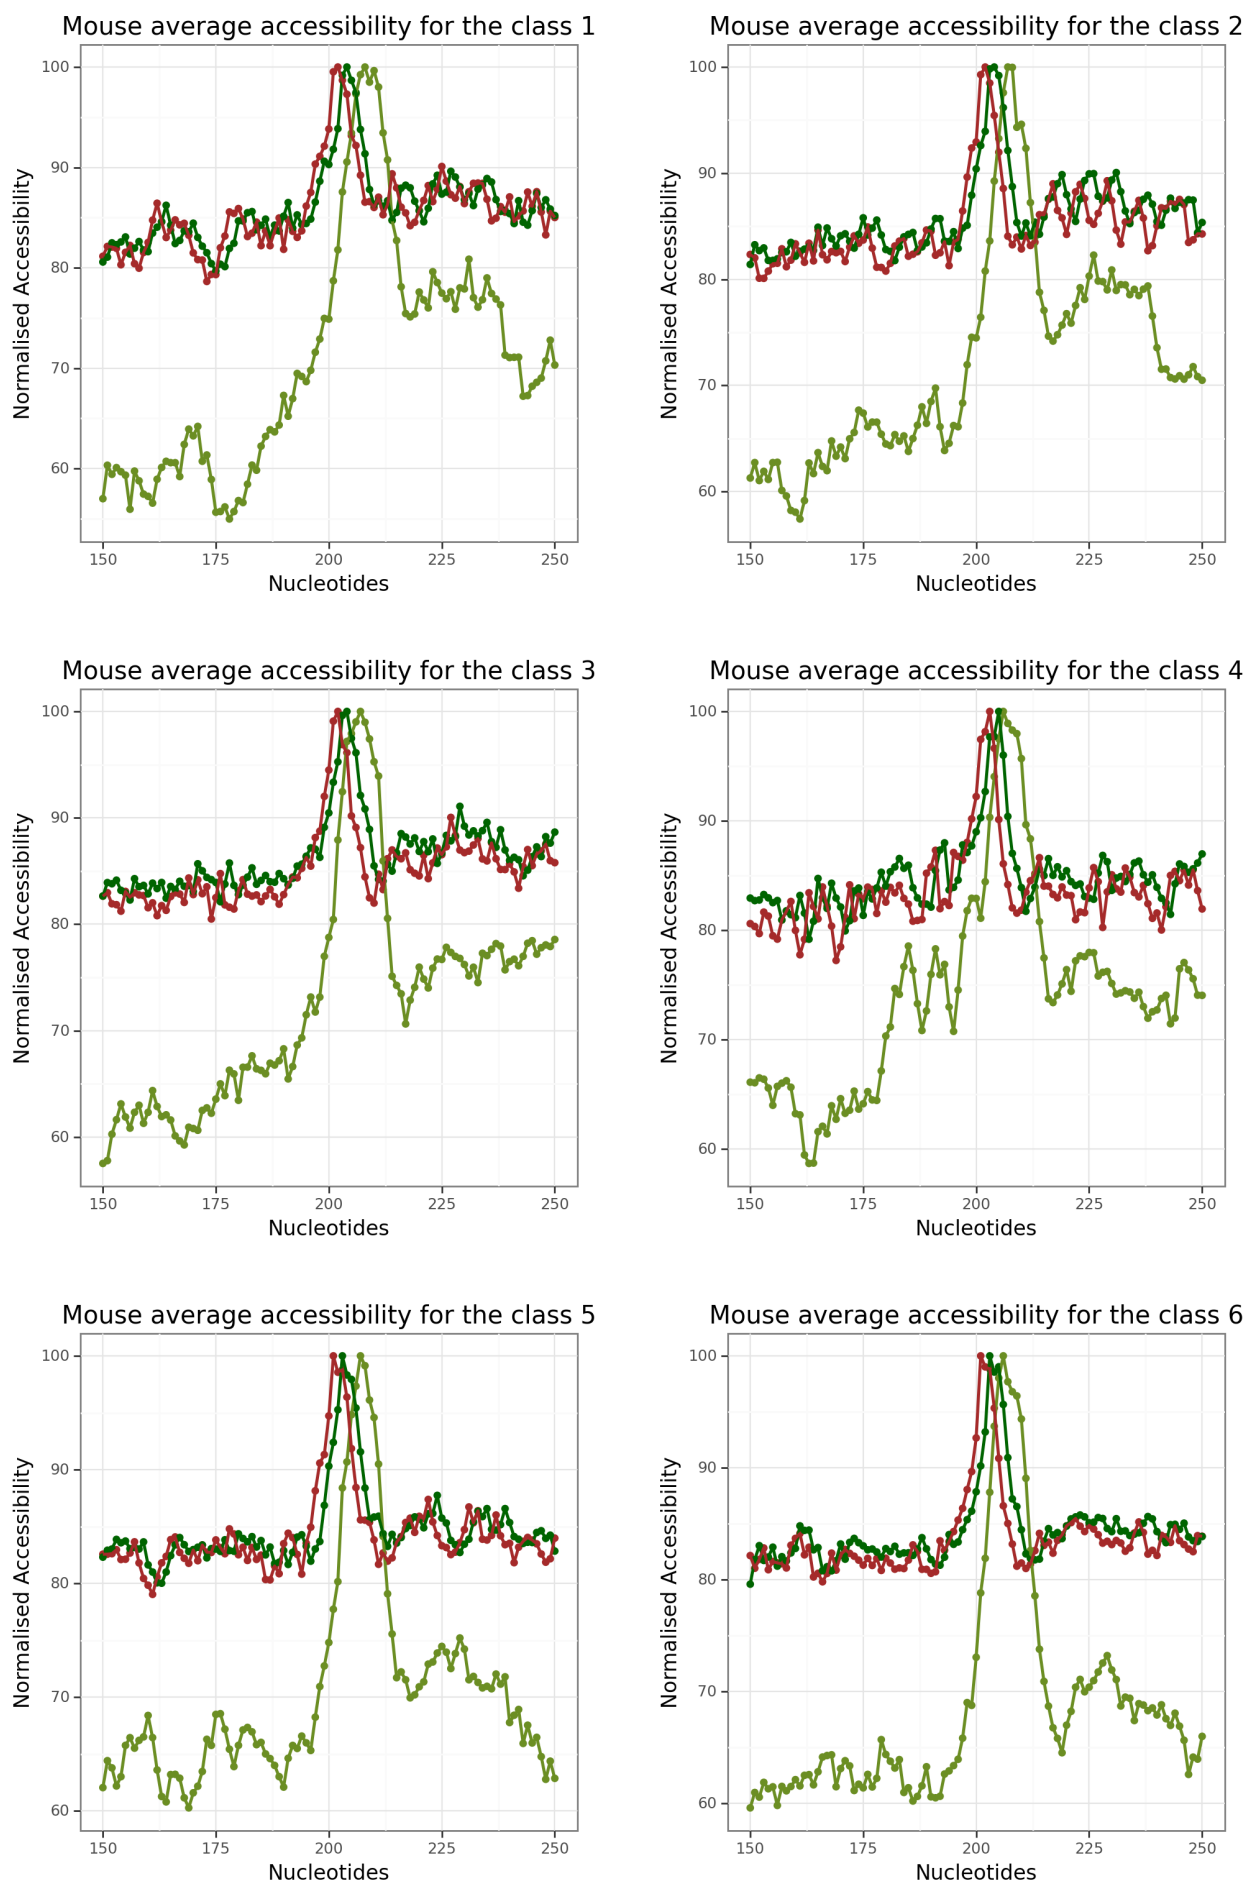

**Figure S6.** Normalised Accessibility of all classes on Seq<sub>W</sub> of the mouse dataset. In red, the normalised accessibility when considering only the optimal structure with a sliding window. In darkgreen and in olivegreen, the normalised accessibility computed with RNAPL FOLD with an accessible window  $u$  of 1 and 8.

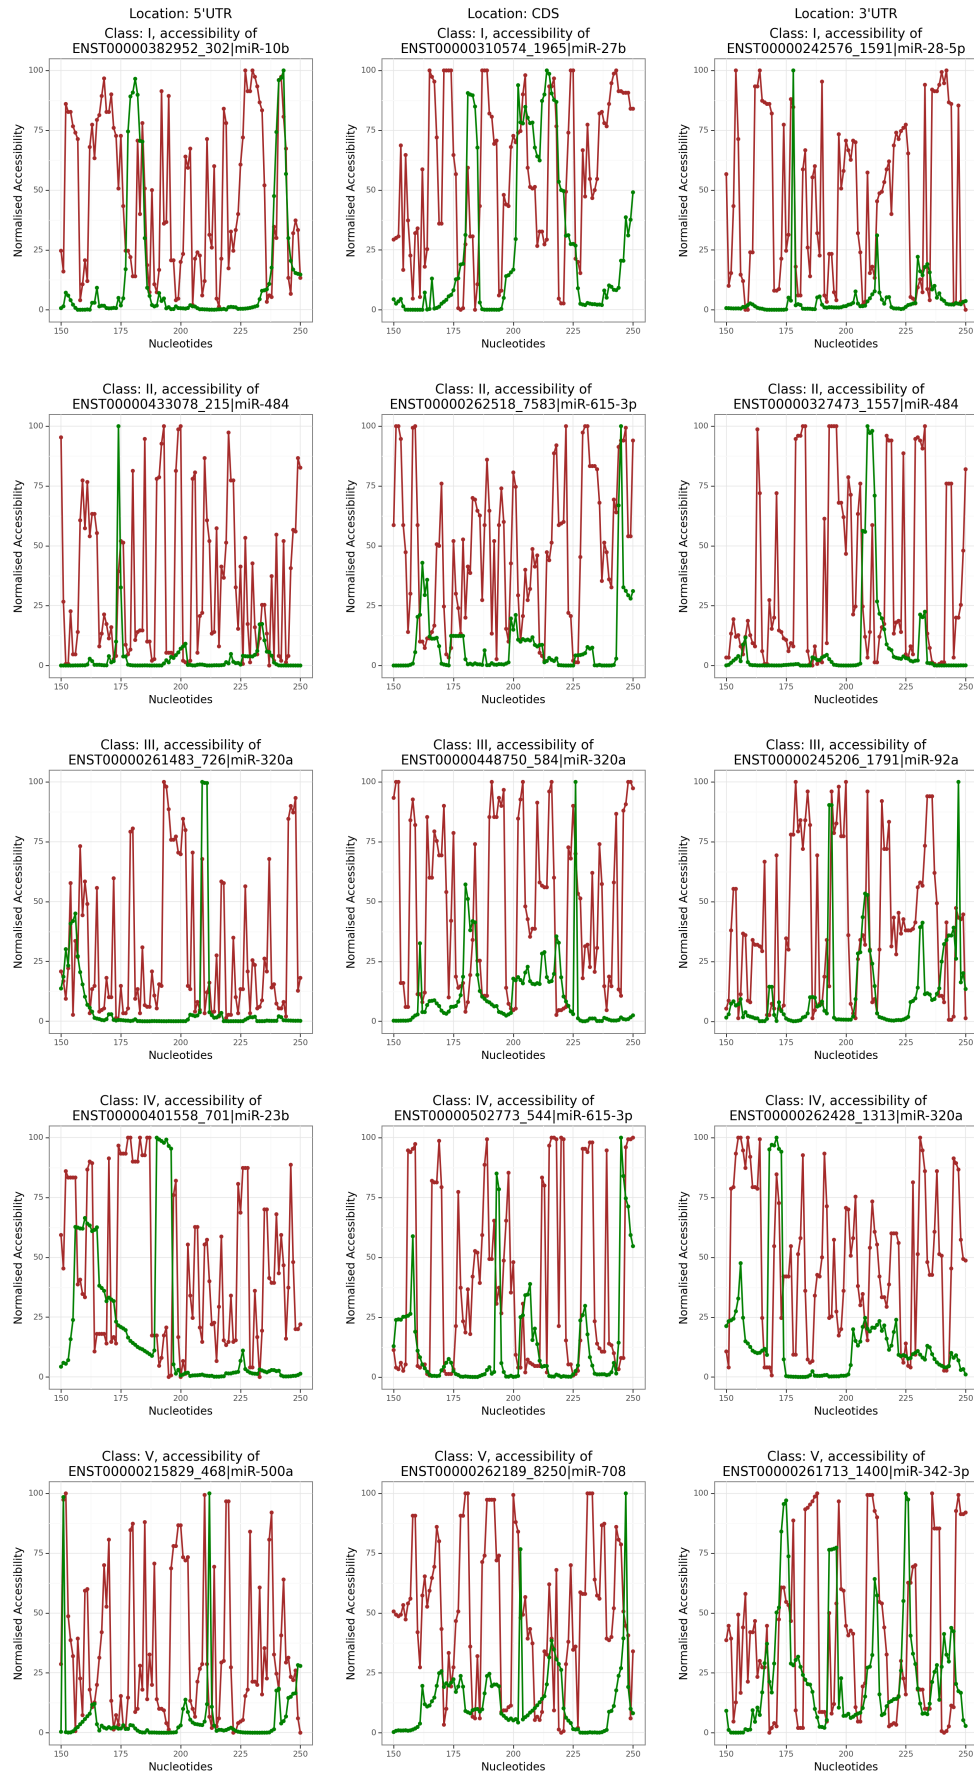

**Figure S7.** One randomly selected interaction for each class on each location on the human dataset. In red, the normalised accessibility when considering only the optimal structure with a sliding window. In green, the accessibility computed with RNAPLFOLD with an accessible window  $u$  of 8.

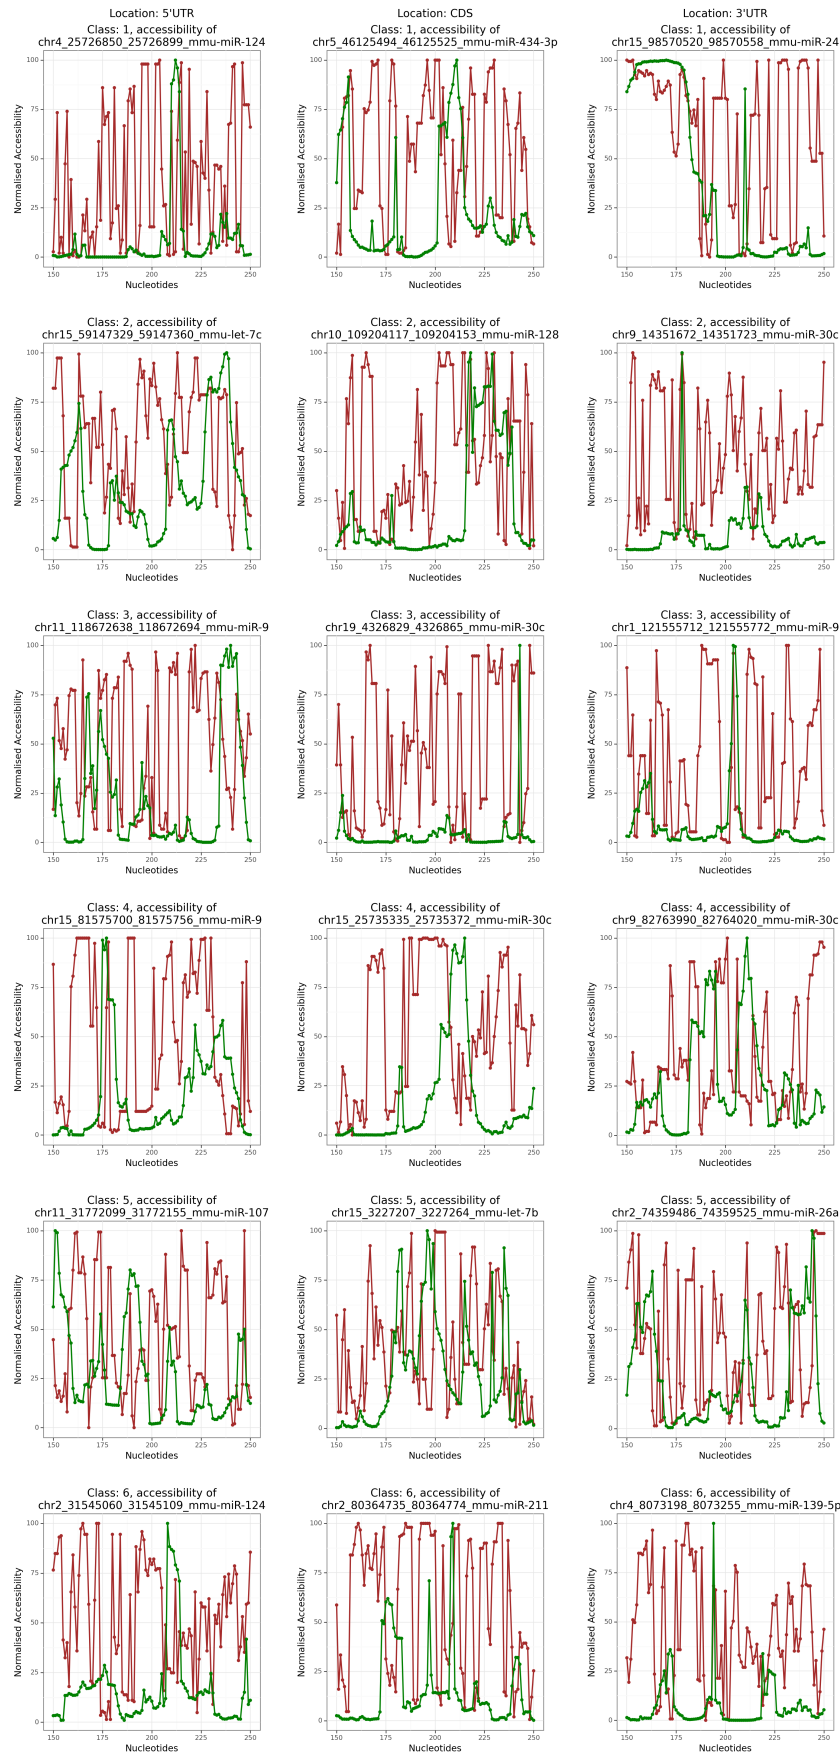

**Figure S8.** One randomly selected interaction for each class on each location on the mouse dataset. In red, the normalised accessibility when considering only the optimal structure with a sliding window. In green, the accessibility computed with RNAPLFOLD with an accessible window  $u$  of 8.

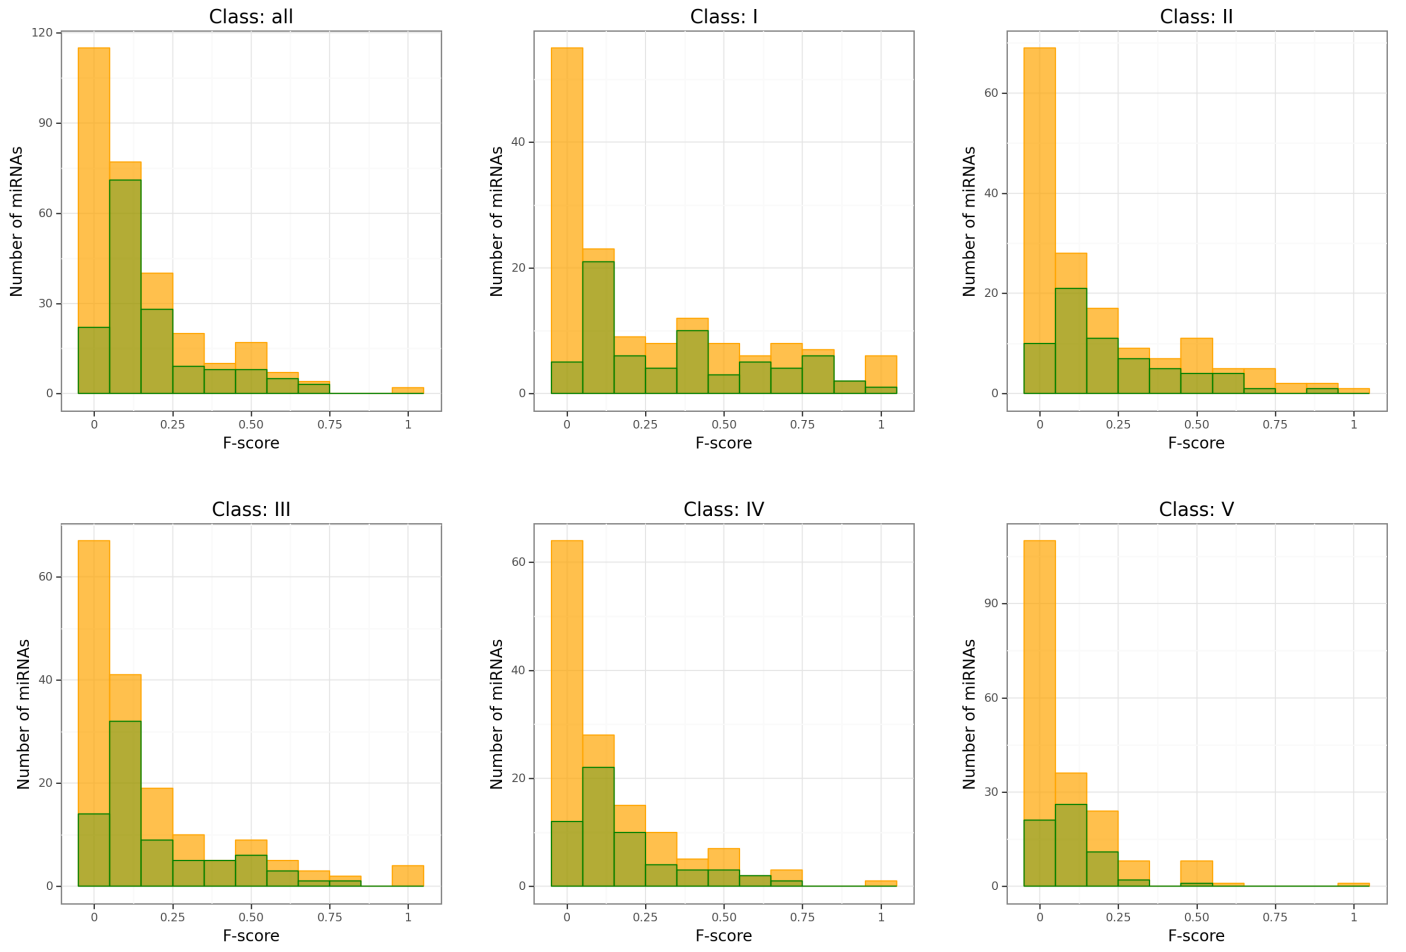

(a) Human dataset

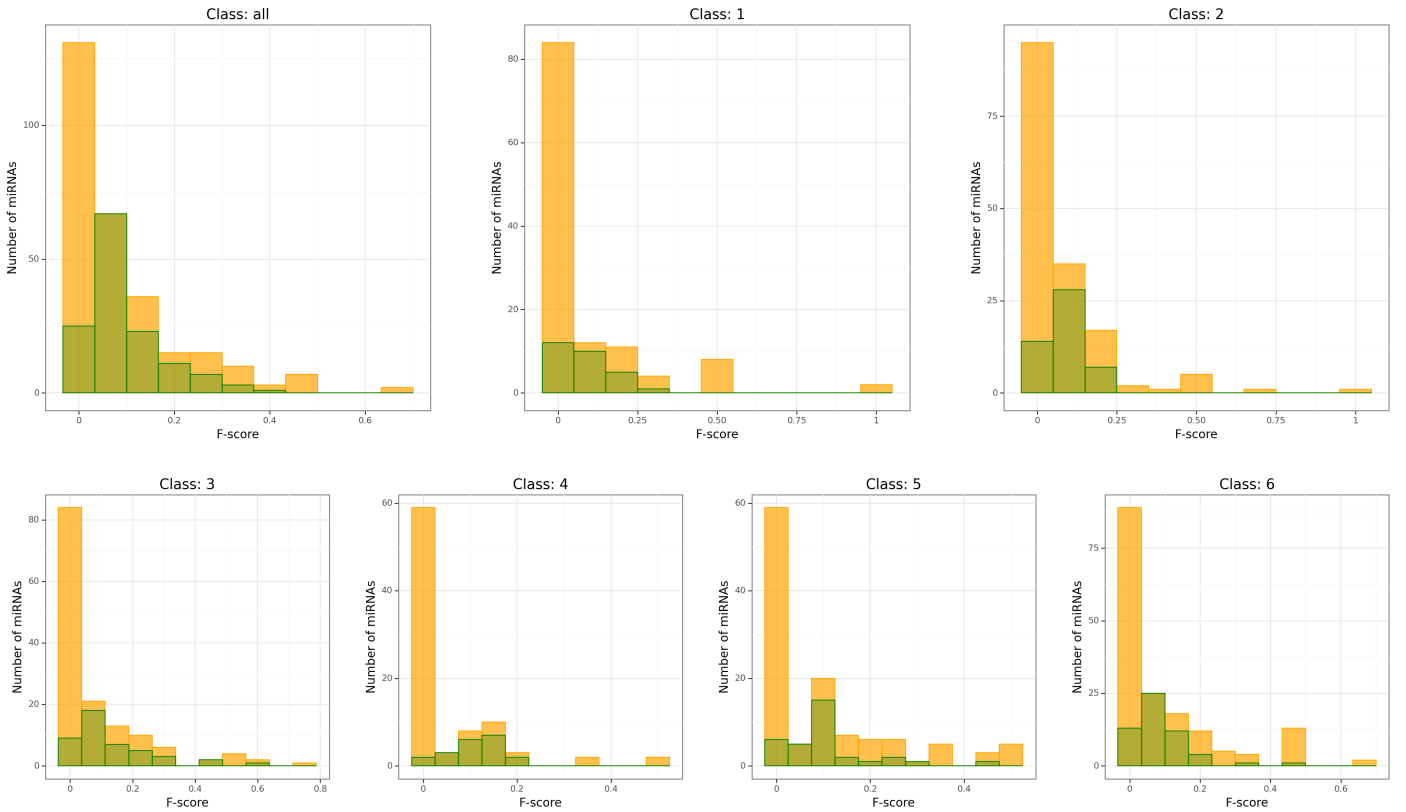

(b) Mouse dataset

**Figure S9.** Histogram representing the number of miRNAs by  $f\text{-score}$  on  $\text{Seq}_{W_i}$  for each dataset and for each class. In orange, are the datasets with at least 2 targets, and in green those with at least 10 targets. Note that the green dataset is a subset of the orange one which implies that the green number of miRNAs is equal or smaller than in the orange.



**Table S2.** Best motif of width between 6 and 23 found by MEME using the ops site distribution. The column "Av. width" corresponds to the average length of the best motif found while the column "#Seqs" corresponds to the total number of sequences for each subset (Total, and then Class I to Class V).

| Input: Seq <sub>W<sub>i</sub></sub> on human and associated with miRNAs targeting at least 2 mRNAs |         |           |                        |                      |       |            |          |          |           |         |
|----------------------------------------------------------------------------------------------------|---------|-----------|------------------------|----------------------|-------|------------|----------|----------|-----------|---------|
| Global numbers                                                                                     |         |           | Occurrences validation |                      |       |            | F-score  |          |           |         |
| Class                                                                                              | #miRNAs | Av. width | #Seqs                  | TP <sub>strong</sub> | FP    | Over-start | Over-end | F-strong | F-overlap | F-score |
| Total                                                                                              | 292     | 14.58     | 15670                  | 2421                 | 13249 | 607        | 531      | 0.15     | 0.23      |         |
| I                                                                                                  | 144     | 13.77     | 3030                   | 822                  | 2208  | 100        | 97       | 0.27     | 0.34      |         |
| II                                                                                                 | 156     | 14.84     | 2770                   | 531                  | 2239  | 113        | 86       | 0.19     | 0.26      |         |
| III                                                                                                | 165     | 15.12     | 3907                   | 729                  | 3178  | 161        | 119      | 0.19     | 0.26      |         |
| IV                                                                                                 | 135     | 14.30     | 2828                   | 447                  | 2381  | 124        | 93       | 0.16     | 0.23      |         |
| V                                                                                                  | 188     | 14.26     | 2898                   | 257                  | 2641  | 112        | 128      | 0.09     | 0.17      |         |

  

| Input: Seq <sub>W<sub>i</sub></sub> on human and associated with miRNAs targeting at least 10 mRNAs |         |           |                        |                      |       |            |          |          |           |         |
|-----------------------------------------------------------------------------------------------------|---------|-----------|------------------------|----------------------|-------|------------|----------|----------|-----------|---------|
| Global numbers                                                                                      |         |           | Occurrences validation |                      |       |            | F-score  |          |           |         |
| Class                                                                                               | #miRNAs | Av. width | #Seqs                  | TP <sub>strong</sub> | FP    | Over-start | Over-end | F-strong | F-overlap | F-score |
| Total                                                                                               | 154     | 16.01     | 15144                  | 2362                 | 12782 | 595        | 517      | 0.16     | 0.23      |         |
| I                                                                                                   | 67      | 14.97     | 2729                   | 755                  | 1974  | 91         | 85       | 0.28     | 0.34      |         |
| II                                                                                                  | 64      | 16.88     | 2382                   | 464                  | 1918  | 101        | 72       | 0.19     | 0.27      |         |
| III                                                                                                 | 76      | 16.61     | 3543                   | 672                  | 2871  | 145        | 112      | 0.19     | 0.26      |         |
| IV                                                                                                  | 57      | 16.00     | 2520                   | 412                  | 2108  | 118        | 88       | 0.16     | 0.25      |         |
| V                                                                                                   | 61      | 15.93     | 2372                   | 205                  | 2167  | 99         | 108      | 0.09     | 0.17      |         |



**Table S3.** Best motif of width between 6 and 23 found by MEME using the oops site distribution. The column "Av. width" corresponds to the average length of the best motif found while the column "#Seqs" corresponds to the total number of sequences for each subset (Total, and then Class 1 to Class 6).

| Input: Seq <sub>W<sub>i</sub></sub> on mouse and associated with miRNAs targeting at least 2 mRNAs  |         |           |                        |                      |      |            |          |          |           |  |
|-----------------------------------------------------------------------------------------------------|---------|-----------|------------------------|----------------------|------|------------|----------|----------|-----------|--|
| Global numbers                                                                                      |         |           | Occurrences validation |                      |      |            | F-score  |          |           |  |
| Class                                                                                               | #miRNAs | Av. width | #Seqs                  | TP <sub>strong</sub> | FP   | Over-start | Over-end | F-strong | F-overlap |  |
| All                                                                                                 | 285     | 14.72     | 9641                   | 776                  | 8865 | 302        | 320      | 0.08     | 0.15      |  |
| 1                                                                                                   | 121     | 13.18     | 1357                   | 112                  | 1245 | 34         | 32       | 0.08     | 0.13      |  |
| 2                                                                                                   | 157     | 13.40     | 2287                   | 213                  | 2074 | 57         | 61       | 0.09     | 0.14      |  |
| 3                                                                                                   | 143     | 14.01     | 1908                   | 208                  | 1700 | 55         | 55       | 0.11     | 0.17      |  |
| 4                                                                                                   | 87      | 14.36     | 922                    | 81                   | 841  | 30         | 33       | 0.09     | 0.16      |  |
| 5                                                                                                   | 117     | 13.62     | 2057                   | 202                  | 1855 | 41         | 63       | 0.10     | 0.15      |  |
| 6                                                                                                   | 168     | 14.10     | 2624                   | 212                  | 2412 | 88         | 101      | 0.08     | 0.15      |  |
| Input: Seq <sub>W<sub>i</sub></sub> on mouse and associated with miRNAs targeting at least 10 mRNAs |         |           |                        |                      |      |            |          |          |           |  |
| Global numbers                                                                                      |         |           | Occurrences validation |                      |      |            | F-score  |          |           |  |
| Class                                                                                               | #miRNAs | Av. width | #Seqs                  | TP <sub>strong</sub> | FP   | Over-start | Over-end | F-strong | F-overlap |  |
| All                                                                                                 | 136     | 15.37     | 8982                   | 719                  | 8263 | 282        | 298      | 0.08     | 0.14      |  |
| 1                                                                                                   | 28      | 15.36     | 1034                   | 86                   | 948  | 26         | 28       | 0.08     | 0.14      |  |
| 2                                                                                                   | 49      | 14.98     | 1882                   | 179                  | 1703 | 49         | 55       | 0.10     | 0.15      |  |
| 3                                                                                                   | 45      | 15.36     | 1495                   | 179                  | 1316 | 42         | 42       | 0.12     | 0.18      |  |
| 4                                                                                                   | 20      | 15.65     | 678                    | 71                   | 607  | 21         | 28       | 0.10     | 0.18      |  |
| 5                                                                                                   | 33      | 15.06     | 1684                   | 159                  | 1525 | 33         | 57       | 0.09     | 0.15      |  |
| 6                                                                                                   | 56      | 16.55     | 2193                   | 171                  | 2022 | 74         | 89       | 0.08     | 0.15      |  |

Human dataset summary boxplot with at least 2 sequences

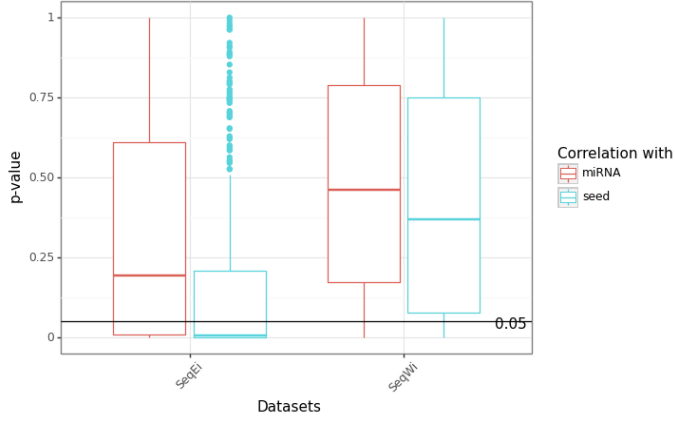

Human dataset summary boxplot with at least 10 sequences

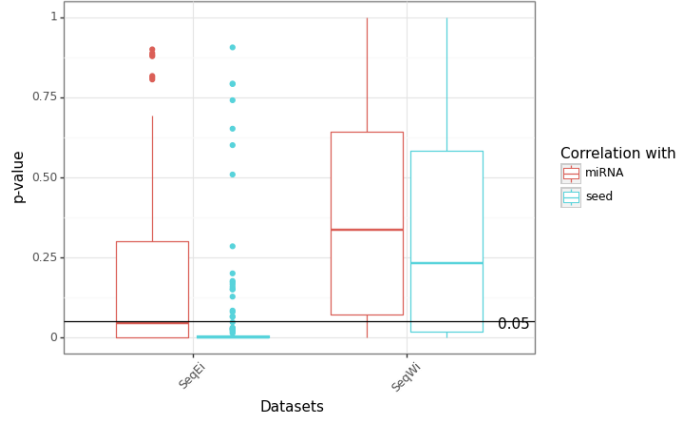

(a) Correlation with the miRNA and the seed summarized.

Human Seq<sub>E</sub> datasets with at least 2 sequences

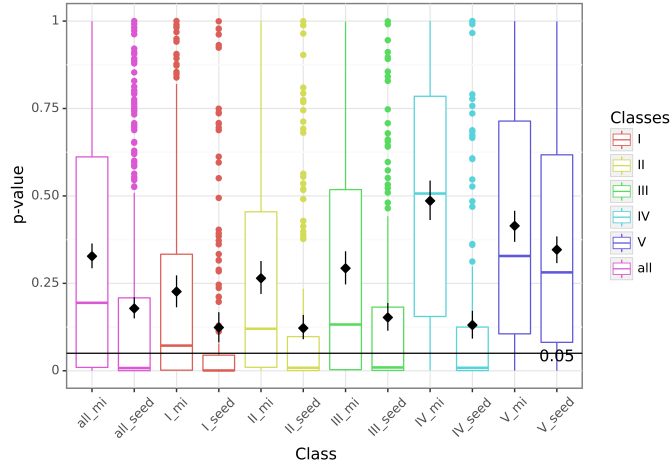

Human Seq<sub>E</sub> datasets with at least 10 sequences

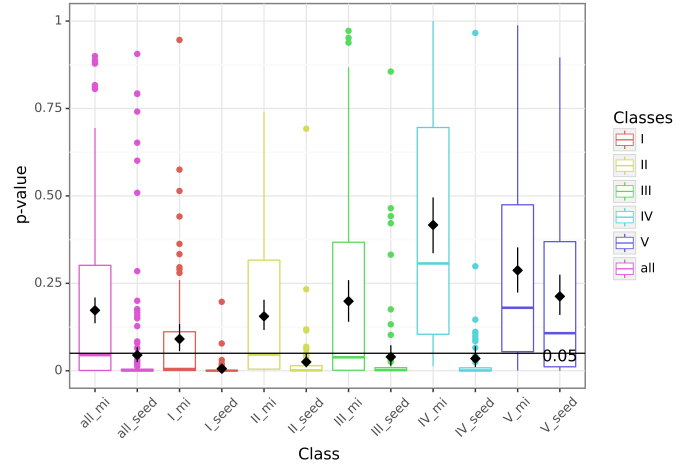

(b) P-value from the comparison of the motifs with the sequences given by CLASH. The boxplot indicates the distribution of the p-values for each class when comparing the best motif predicted by MEME with either the seed (seed) or the miRNA (mi) on datasets with more than 2 or 10 sequences.

Human seq<sub>W</sub> datasets with at least 2 sequences

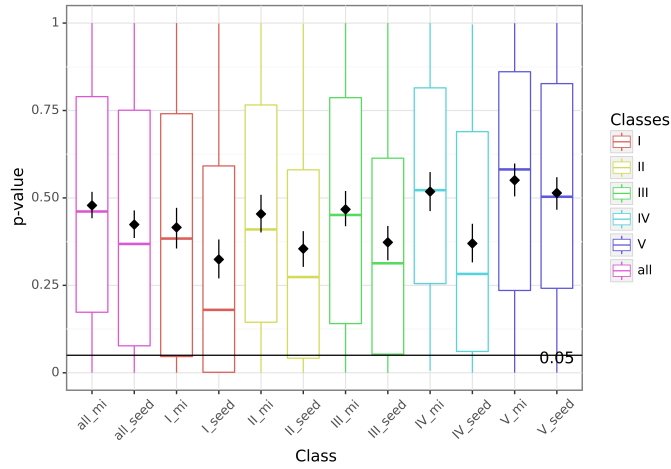

Human seq<sub>W</sub> datasets with at least 10 sequences

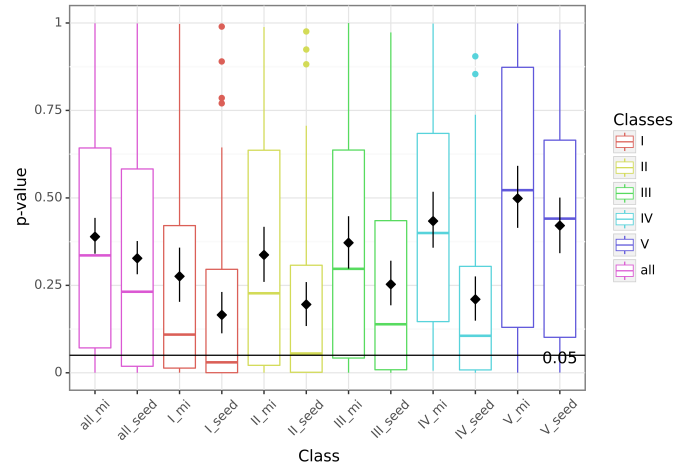

(c) P-value from the comparison of the motifs with Seq<sub>W</sub> datasets. The boxplot indicates the distribution of the p-values for each class when comparing the best motif predicted by MEME with either the seed (seed) or the miRNA (mi) on datasets with more than 2 or 10 sequences.

Figure S10. Boxplots on the human dataset.

Mouse dataset summary boxplot with at least 2 sequences

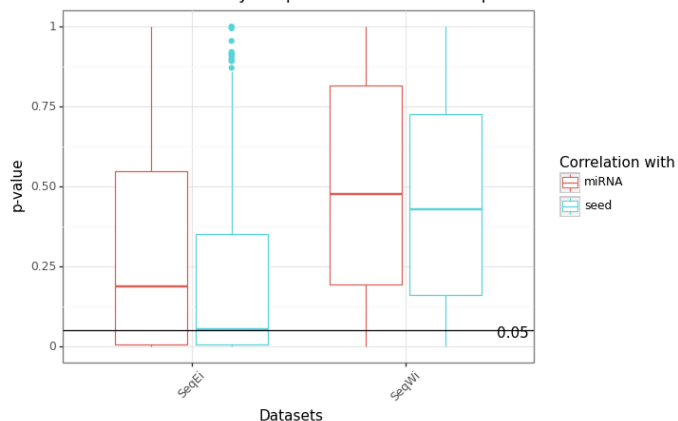

Mouse dataset summary boxplot with at least 10 sequences

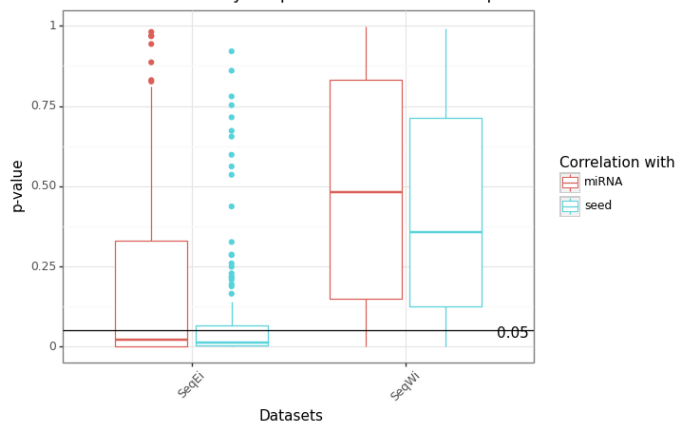

(a) Correlation with the miRNA and the seed summarized.

Mouse Seq<sub>E</sub> datasets with at least 2 sequences

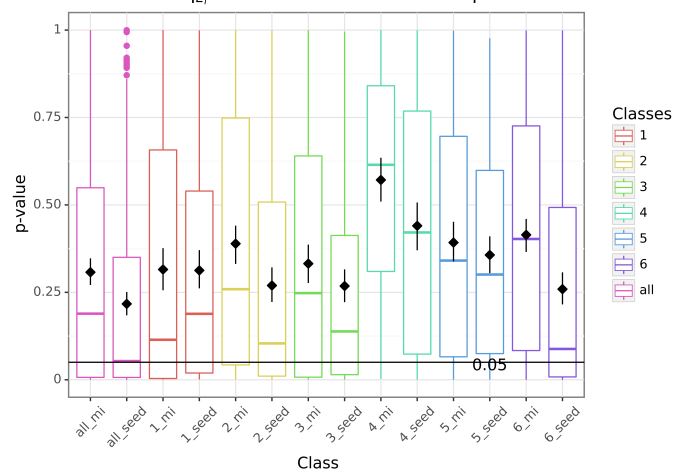

Mouse Seq<sub>E</sub> datasets with at least 10 sequences

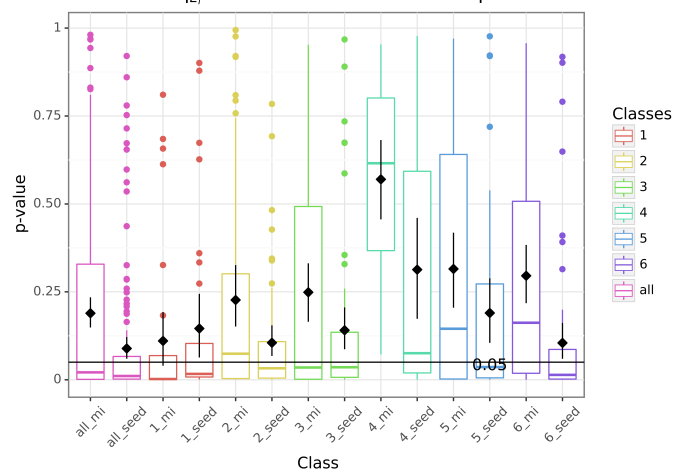

(b) P-value from the comparison of the motifs with the sequences given by CLASH. The boxplot indicates the distribution of the p-values for each class when comparing the best motif predicted by MEME with either the seed (seed) or the miRNA (mi) on datasets with more than 2 or 10 sequences.

Mouse seq<sub>W</sub> datasets with at least 2 sequences

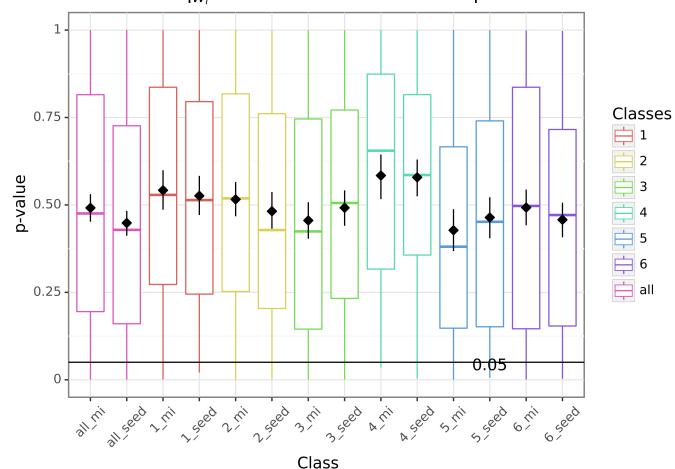

Mouse seq<sub>W</sub> datasets with at least 10 sequences

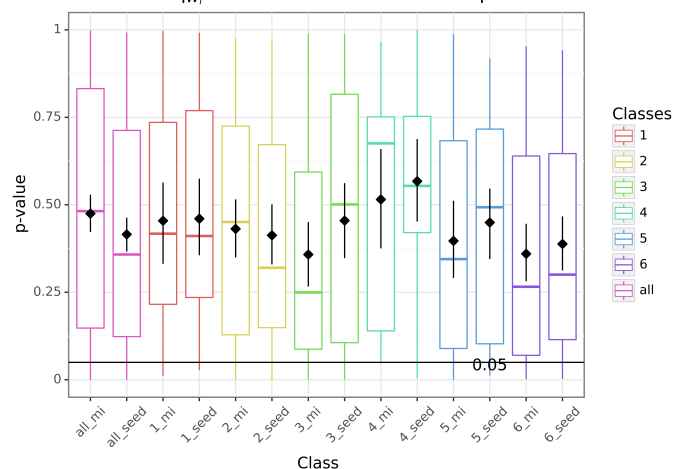

(c) P-value from the comparison of the motifs with Seq<sub>W</sub> datasets. The boxplot indicates the distribution of the p-values for each class when comparing the best motif predicted by MEME with either the seed (seed) or the miRNA (mi) on datasets with more than 2 or 10 sequences.

Figure S11. Boxplots on the mouse dataset.
